# Supplementary material for: Identifying the impact of chemical functional groups on ionic liquid conductivity
Source: Royal Society of Chemistry journal article supplement (doi:10.1039/d6sc02121b), 2026-05-27
Supplement: d6sc02121b1.pdf [file d6sc02121b1.pdf]

## Identifying the Impact of Chemical Functional Groups on Ionic Liquid Conductivity

By: J. E. Umaña, N. A. Zawicki, Matthew A. Gebbie, Victor M. Zavala, and Rose K. Cersonsky\*

Department of Chemical and Biological Engineering, University of Wisconsin—Madison, Madison, WI 53706, United States of America

\*Corresponding Author

### Regression Results

**Table S1.** Train set coefficients of determination ( $R^2$ ) and root mean squared errors (RMSE) for linear ridge regression, RBF kernel regression, random forest regression, and multi-layer perceptron neural network regression models employed for conductivity at 298 K using the SMARTS<sup>1,2</sup> representation we developed (SMARTS), MACCS Keys<sup>3</sup> (MACCS), and a 36-dimension MACCS principal component representation (PCA MACCS).

| Model                    | SMARTS $R^2$ | SMARTS RMSE | MACCS $R^2$ | MACCS RMSE | PCA MACCS $R^2$ | PCA MACCS RMSE |
|--------------------------|--------------|-------------|-------------|------------|-----------------|----------------|
| Ridge Regression         | 0.711        | 0.430       | 0.664       | 0.464      | 0.579           | 0.519          |
| RBF Kernel Regression    | 0.97         | 0.139       | 0.981       | 0.112      | 0.950           | 0.179          |
| Random Forest Regression | 0.935        | 0.203       | 0.934       | 0.206      | 0.912           | 0.237          |
| MLP Neural Network       | 0.980        | 0.113       | 0.982       | 0.107      | 0.988           | 0.088          |

**Table S2.** Train set coefficients of determination ( $R^2$ ) and root mean squared errors (RMSE) for linear ridge regression, RBF kernel regression, random forest regression, and multi-layer perceptron neural network regression models employed for conductivity for all temperatures using the SMARTS<sup>1,2</sup> representation we developed (SMARTS), MACCS Keys<sup>3</sup> (MACCS), and a 36-dimension MACCS principal component representation (PCA MACCS).

| Model                    | SMARTS $R^2$ | SMARTS RMSE | MACCS $R^2$ | MACCS RMSE | PCA MACCS $R^2$ | PCA MACCS RMSE |
|--------------------------|--------------|-------------|-------------|------------|-----------------|----------------|
| Ridge Regression         | 0.721        | 1.019       | 0.768       | 0.930      | 0.739           | 0.986          |
| RBF Kernel Regression    | 0.979        | 0.278       | 0.995       | 0.143      | 0.988           | 0.209          |
| Random Forest Regression | 0.966        | 0.356       | 0.992       | 0.174      | 0.994           | 0.154          |
| MLP Neural Network       | 0.973        | 0.318       | 0.978       | 0.288      | 0.985           | 0.235          |

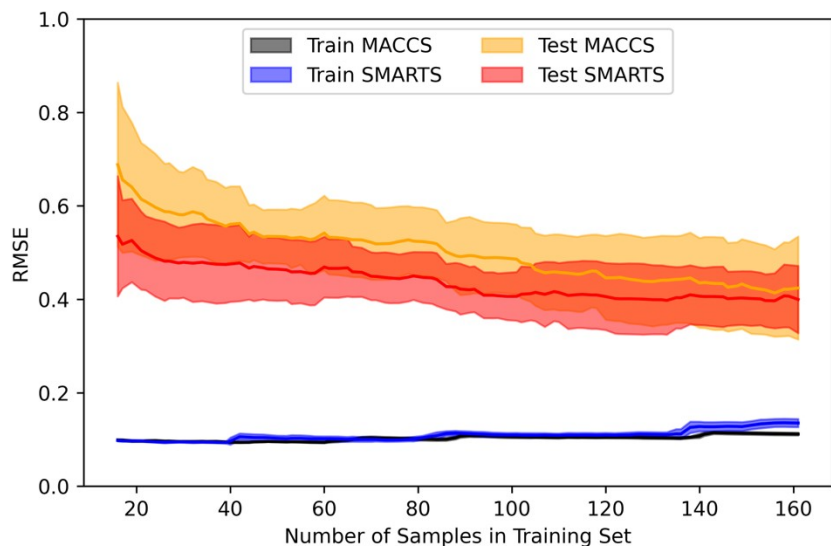

**Figure S1.** Kernel SVM learning curves using SMARTS and MACCS Keys representation for conductivity at 298 K. Plots shown are means and standard deviations of training and test sets for 10-fold cross validations.

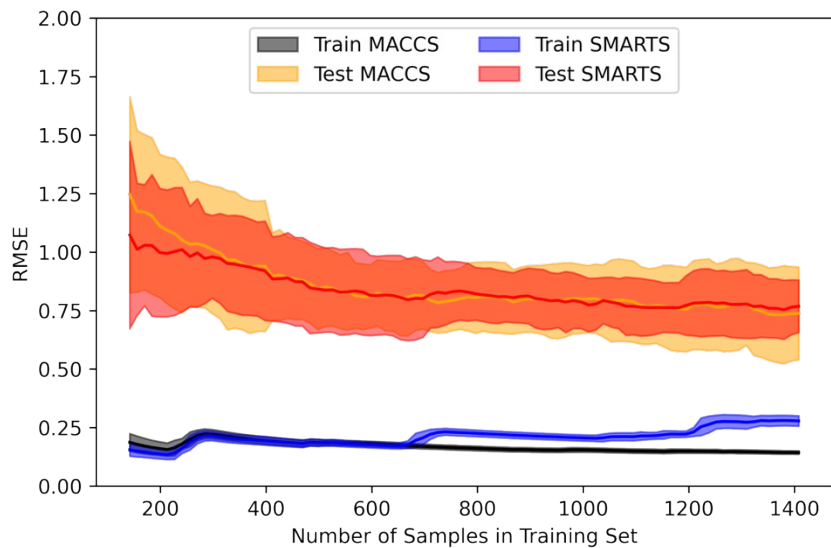

**Figure S2** Kernel SVM learning curves using SMARTS and MACCS Keys representation for temperature-dependent molar conductivity. Plots shown are means and standard deviations of training and test sets for 10-fold cross validations.

## Principal Covariates Regression Results

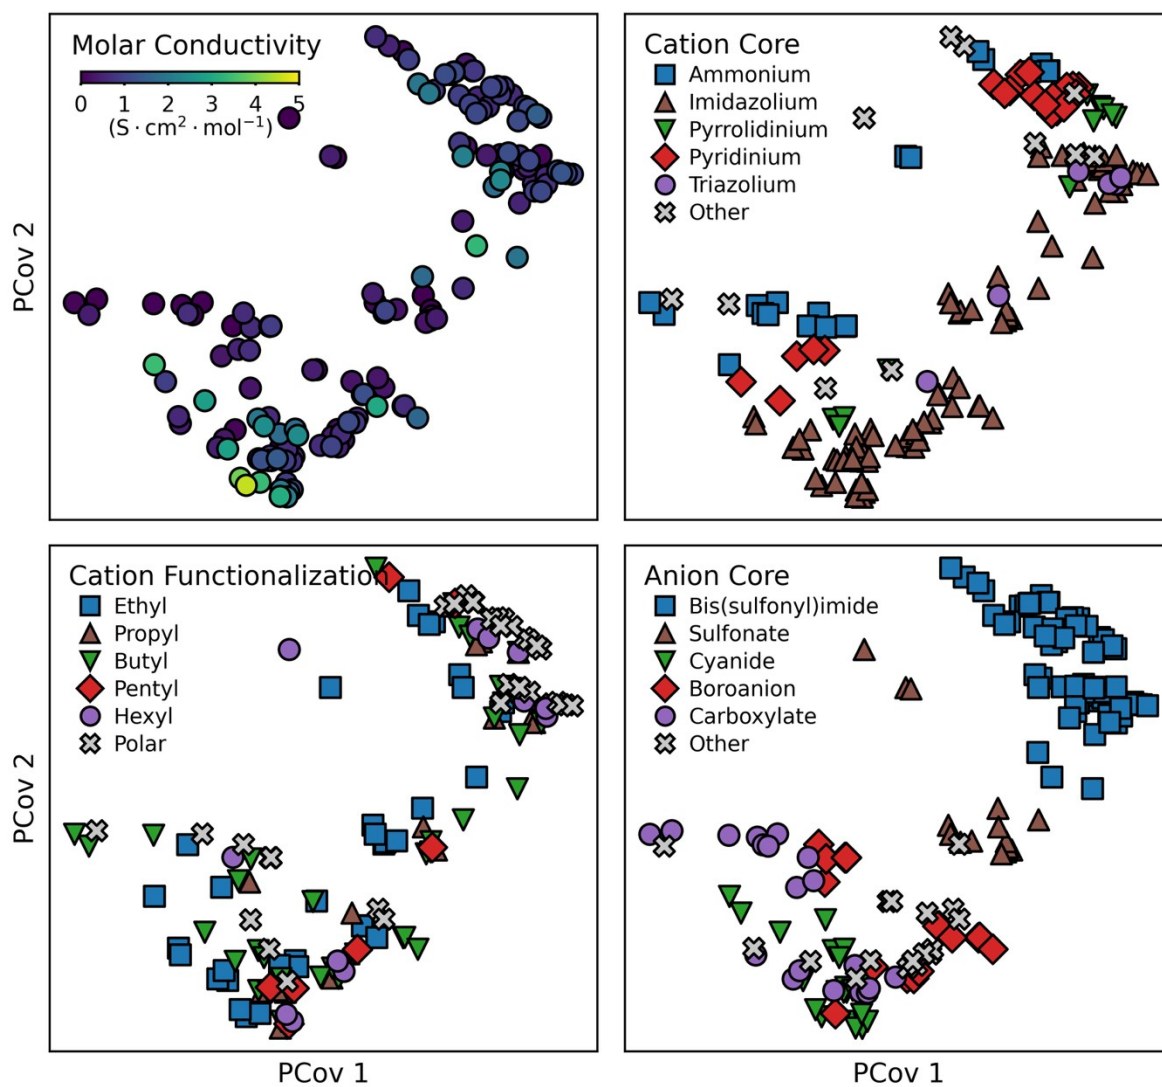

**Figure S3:** 2-dimensional principal covariate data projections of 182 ionic liquids represented by MACCS Keys overlaid with molar conductivity at 298 K (Top Left), cation core identity (Top Right), cation functionalization (Bottom Left), and anion core identity (Bottom Right).

**Table S3.** SMARTS fragments weights for PCovR<sup>4</sup> 1 and 2. <sup>c</sup>Cationic Structure. <sup>a</sup>Anionic Structure.

| <b>Name:</b>                    | <b>PCovR 1:</b> | <b>PCovR 2:</b> |
|---------------------------------|-----------------|-----------------|
| Ammonium OH <sup>c</sup>        | 0.0562          | -0.0208         |
| Ammonium 3H <sup>c</sup>        | 0.2213          | 0.4437          |
| Pyrrolidinium <sup>c</sup>      | 0.1365          | 0.2618          |
| Imidazolium <sup>c</sup>        | 0.2653          | 0.3955          |
| Pyridinium <sup>c</sup>         | 0.1372          | 0.2383          |
| Triazolium <sup>c</sup>         | -0.0915         | -0.2551         |
| Ether <sup>c</sup>              | -0.0451         | -0.2656         |
| Nitrile <sup>c</sup>            | -0.2235         | -0.5156         |
| Propyl <sup>c</sup>             | 0.1346          | -0.3857         |
| Butyl <sup>c</sup>              | 0.0097          | -0.4972         |
| Pentyl <sup>c</sup>             | 0.0252          | -0.1880         |
| Hexyl <sup>c</sup>              | -0.0204         | -0.2428         |
| Hydroxyl <sup>c</sup>           | -0.0828         | -0.2016         |
| Secondary Amine                 | -0.1790         | -0.4430         |
| 3-Unit Chain <sup>c</sup>       | 0.1889          | -0.2671         |
| 4-Unit Chain <sup>c</sup>       | 0.2639          | -0.0858         |
| Nitrile <sup>a</sup>            | 0.3075          | 0.7243          |
| Methyl <sup>a</sup>             | -0.1735         | -0.4162         |
| Ethyl <sup>a</sup>              | -0.0437         | -0.1134         |
| Propyl <sup>a</sup>             | -0.1088         | -0.2545         |
| Fluoromethyl <sup>a</sup>       | 0.1416          | 0.2402          |
| e- Fluoromethyl <sup>a</sup>    | 0.0290          | -0.3287         |
| Fluoroethyl <sup>a</sup>        | -0.0727         | -0.2444         |
| Fluoropropyl <sup>a</sup>       | -0.0714         | -0.2042         |
| Fluorobutyl <sup>a</sup>        | -0.0691         | -0.1799         |
| Hydroxyl <sup>a</sup>           | -0.0159         | -0.0806         |
| 2-Unit Chain <sup>a</sup>       | 0.3358          | 0.1883          |
| 3-Unit Chain <sup>a</sup>       | 0.3358          | 0.1883          |
| 4-Unit Chain <sup>a</sup>       | 0.3738          | 0.3864          |
| Bis(sulfonyl)imide <sup>a</sup> | 0.2698          | 0.2904          |
| Sulfonate <sup>a</sup>          | 0.0495          | 0.0623          |
| Cyanide <sup>a</sup>            | 0.0345          | 0.1053          |
| Carboxylate <sup>a</sup>        | 0.0930          | 0.1267          |
| Phosphate <sup>a</sup>          | 0.1253          | 0.2376          |
| Borate <sup>a</sup>             | 0.1580          | 0.2657          |
| Carboxyl <sup>a</sup>           | 0.0319          | 0.0569          |

## Methodology

**Table S4.** SMARTS definitions used for substructure matching ionic liquid molecular structures. Structures which were excluded due to overrepresentation (present in more than 179 of 182 ionic liquid structures) or underrepresented (present in less than 4 of 182 ionic liquid structures) are with an asterisk. \*Structure was not included, \*\*Structure was included for cations but not for anions, \*\*\*Structure was included for anions but not for cations. <sup>c</sup>Cationic Structure. <sup>a</sup>Anionic Structure.

| Name:                                | SMARTS:                                          | Other representations: |
|--------------------------------------|--------------------------------------------------|------------------------|
| Ammonium OH <sup>c</sup>             | [#7+;D4;H0;!R]                                   |                        |
| Ammonium 1H <sup>c,*</sup>           | [#7+;D3;H1;!R]                                   |                        |
| Ammonium 2H <sup>c,*</sup>           | [#7+;D2;H2;!R]                                   |                        |
| Ammonium 3H <sup>c</sup>             | [#7+;D1;H3;!R]                                   |                        |
| Pyrrolidinium <sup>c</sup>           | [N+;R]1(CCCC1)                                   |                        |
| Imidazolium <sup>c</sup>             | [n;H0]1cc[n+;H0]c1                               | [n+;H0]1cc[n;H0]c1     |
| Trialkylimidazolium <sup>c,*</sup>   | n1**[n+]c1~c                                     | [n+]1**nc1~c           |
| Piperidinium <sup>c,*</sup>          | [N+]1(CCCCC1)                                    |                        |
| Pyridinium <sup>c</sup>              | c1cc[n+](cc1)                                    |                        |
| Tetrahydrothiophenium <sup>c,*</sup> | C1CC[S+]C1                                       |                        |
| Phosphorus Cation <sup>c,*</sup>     | [P+;D4]                                          |                        |
| Iminium <sup>c,*</sup>               | NC(=[N+])                                        |                        |
| Triazolium <sup>c</sup>              | n1~c~[n+]~c~n~1                                  | [n+]1~c~n~c~n~1        |
| Protic Imidazolium <sup>c,*</sup>    | [n;H1]1**[n+]c1                                  | N1**[n+;H1]c1          |
| Neutral Aromatic Ring: 5-membered*   | [*+0]1[*+0][*+0][*+0][*+0]1                      |                        |
| Neutral Aromatic Ring: 6-membered*   | [*+0]1[*+0][*+0][*+0][*+0][*+0][*+0]1            |                        |
| Ether**                              | C~O~C                                            |                        |
| Nitrile                              | *~[C+0]#[N+0]                                    |                        |
| Carboxyl***                          | [O+0]~C(=O)                                      |                        |
| Methyl***                            | *~[CH3;!R]                                       |                        |
| Ethyl                                | *~[CH2;!R]~*                                     |                        |
| Propyl                               | *~[CH2;!R]~[CH2;!R]~*                            |                        |
| Butyl**                              | *~[CH2;!R]~[CH2;!R]~[CH2;!R]~*                   |                        |
| Pentyl**                             | *~[CH2;!R]~[CH2;!R]~[CH2;!R]~[CH2;!R]~*          |                        |
| Hexyl**                              | *~[CH2;!R]~[CH2;!R]~[CH2;!R]~[CH2;!R]~[CH2;!R]~* |                        |
| Fluoromethyl***                      | C(~F)(~F)(~F)~C(~[*+0])(~[*+0])                  |                        |
| e- Fluoromethyl <sup>a</sup>         | C(~F)(~F)(~F)~C(~[*-])(~[*+0])                   | C(~F)(~F)(~F)~S(~[*-]  |

|                                 |                                                             |                            |
|---------------------------------|-------------------------------------------------------------|----------------------------|
|                                 |                                                             | )](~[*+0])(~[*+0])         |
| Fluoroethyl***                  | *~C(~F)(~F)~C(~F)(~F)(~F)                                   |                            |
| Fluoropropyl***                 | *~C(~F)(~F)~C(~F)(~F)~C(~F)(~F)(~F)                         |                            |
| Fluorobutyl***                  | *~C(~F)(~F)~C(~F)(~F)~C(~F)(~F)~C(~F)(~F)(~F)               |                            |
| Fluoropentyl*                   | *~C(~F)(~F)~C(~F)(~F)~C(~F)(~F)~C(~F)(~F)~C(~F)(~F)(~F)     |                            |
| Fluorohexyl*                    | *~C(~F)(~F)~C(~F)(~F)~C(~F)(~F)~C(~F)(~F)~C(~F)(~F)(~F)(~F) |                            |
| Hydroxyl                        | *~[OH1]                                                     |                            |
| Primary Amine*                  | [#7+0;H2;R0;D1]                                             |                            |
| Secondary Amine**               | [#7+0;H1;R0;D2]                                             |                            |
| Tertiary Amine*                 | [#7+0;H0;R0;D3]                                             |                            |
| 2-Unit Chain***                 | [A;!R]~[A;!R]                                               |                            |
| 3-Unit Chain                    | [A;!R]~[A;!R]~[A;!R]                                        |                            |
| 4-Unit Chain                    | [A;!R]~[A;!R]~[A;!R]~[A;!R]                                 |                            |
| Bis(sulfonyl)imide <sup>a</sup> | *~S(=O)(=O)[N-]S(=O)(=O)~*                                  | *~S(=O)([O-])=NS(=O)(=O)~* |
| Sulfonate <sup>a</sup>          | *~[S-](~O)(~O)~O                                            | *~S(~[O-])(~O)~O           |
| Cyanide <sup>a</sup>            | [*;!X4]~C#N                                                 | [*;!X4]=C=[N-]             |
| Carboxylate <sup>a</sup>        | *~C(=O)[O-]                                                 |                            |
| Azide <sup>a,*</sup>            | [N-]=[N+]=[N-]                                              | [N--]-[N+]#N               |
| Nitrate <sup>a,*</sup>          | [N+](~O)(~[O-])(~[O-])                                      |                            |
| Perrhenate <sup>a,*</sup>       | [Re](~[O-])(~O)(~O)(~O)                                     | [Re-](~O)(~O)(~O)(~O)      |
| Phosphate <sup>a</sup>          | [P-;D6]                                                     | [P;D4]~[O-]                |
| Borate <sup>a</sup>             | [B-;D4]                                                     |                            |
| Diazole Anion <sup>a,*</sup>    | c1~c~n~c~[n-]1                                              | c1~c~[n-]~c~n~1            |

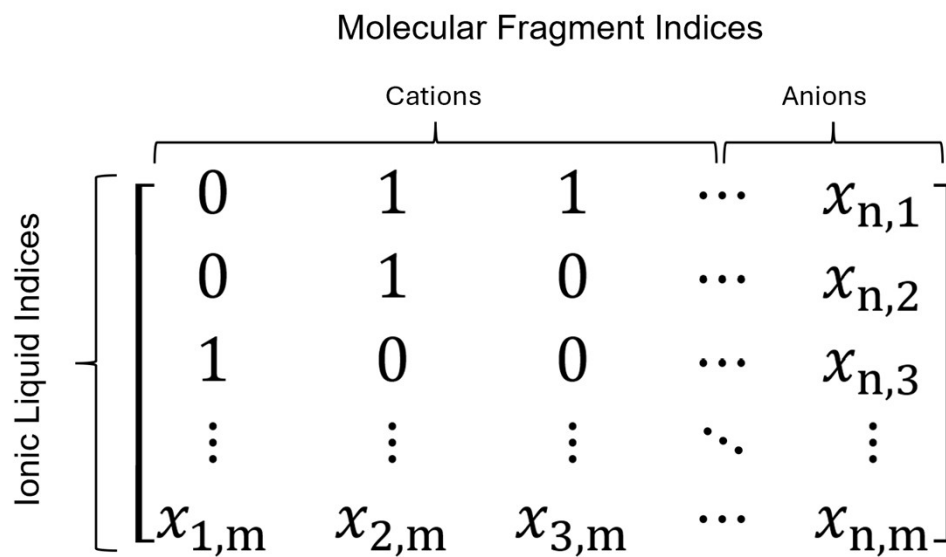

**Figure S4.** Visualization of an  $n \times m$  isothermal bit matrix created for machine learning analysis, where  $n$  represents the number of molecular fragment strings and  $m$  denotes the number of ionic liquids in the dataset. Each  $x_{ij}$  element represents a binary state.

## Parity Plots

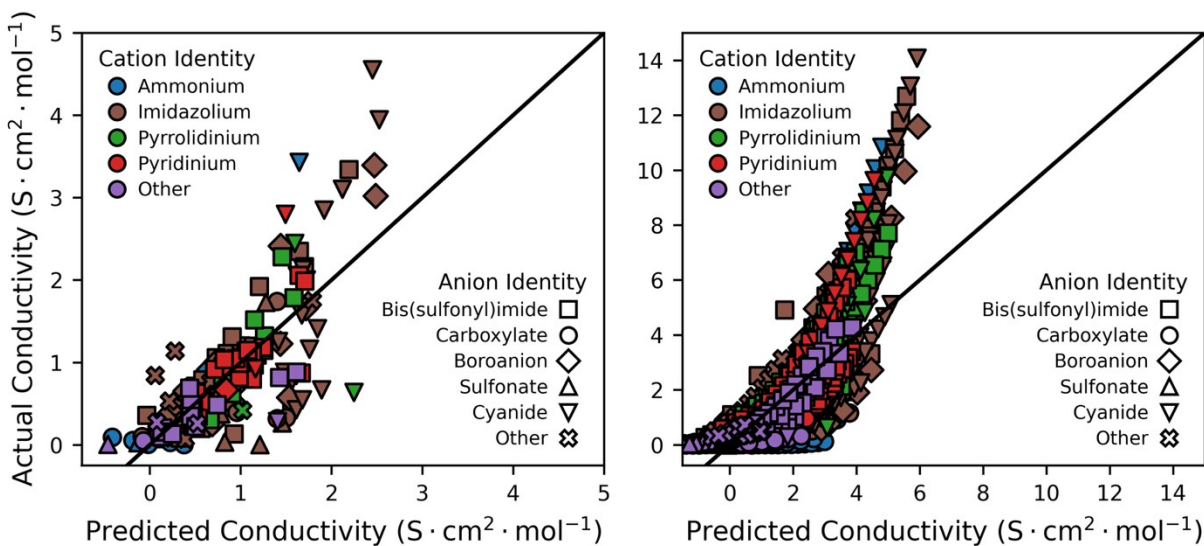

**Figure S5.** Linear ridge regression test set parity plot using our custom SMARTS representation inputs colored by cations and shaped by anions for 298 K (left) and at all temperatures (right).

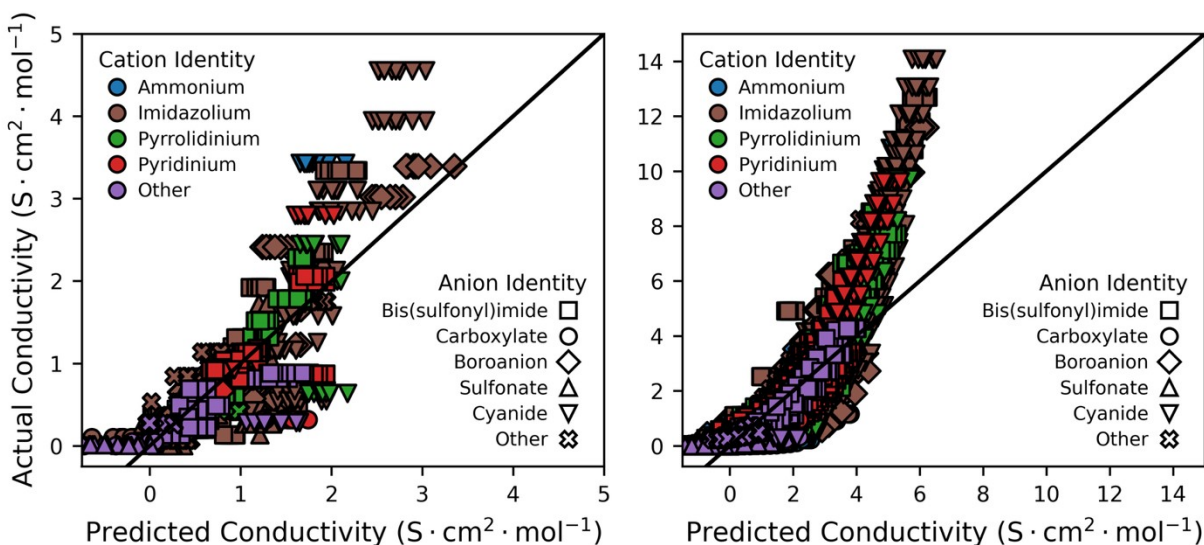

**Figure S6.** Linear ridge regression train set parity plot using our custom SMARTS representation inputs colored by cations and shaped by anions for 298 K (left) and at all temperatures (right).

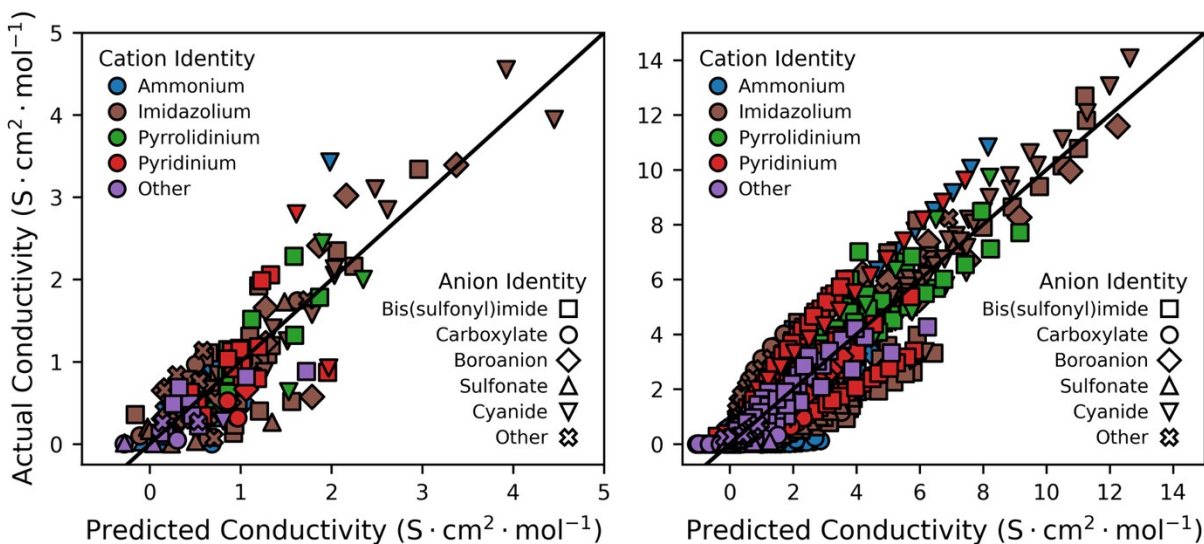

**Figure S7.** RBF kernel ridge regression test set parity plot using our custom SMARTS representation inputs colored by cations and shaped by anions for 298 K (left) and at all temperatures (right).

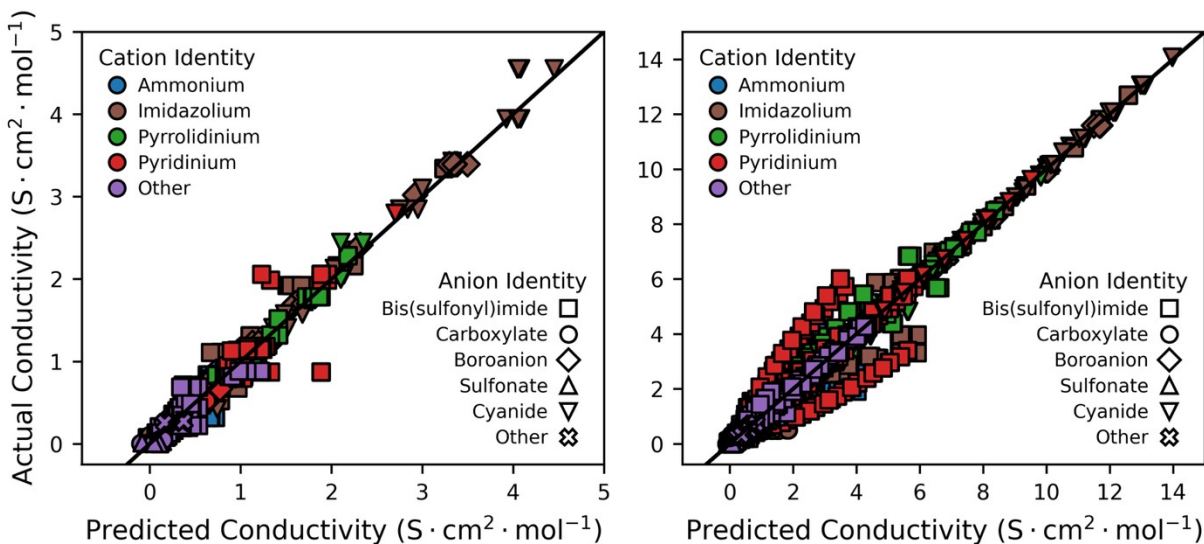

**Figure S8.** RBF kernel ridge regression test train parity plot using our custom SMARTS representation inputs colored by cations and shaped by anions for 298 K (left) and at all temperatures (right).

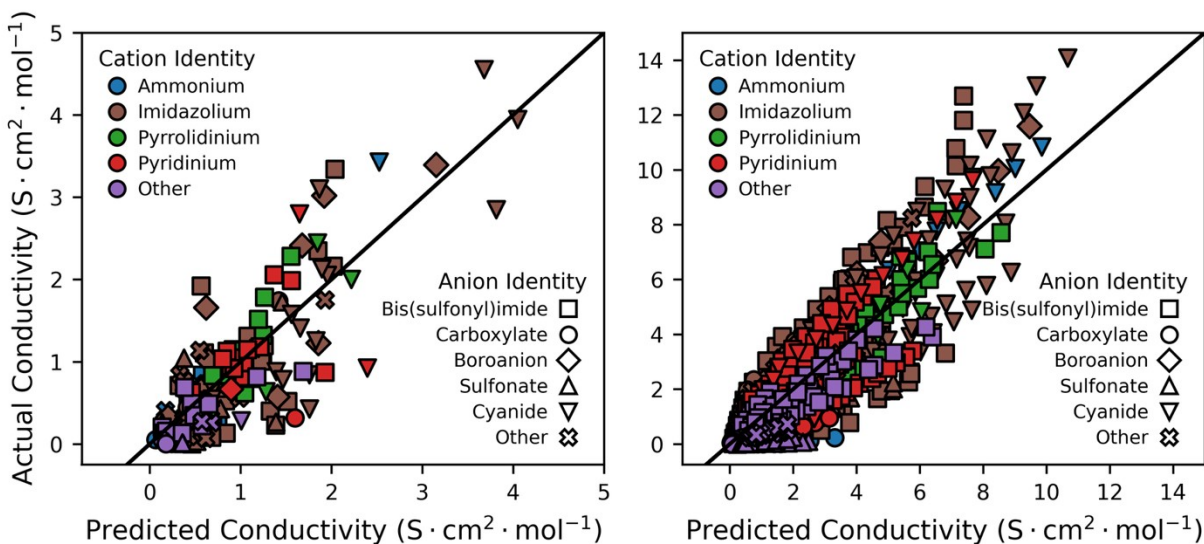

**Figure S9.** Random forest regression test set parity plot using our custom SMARTS representation inputs colored by cations and shaped by anions for 298 K (left) and at all temperatures (right).

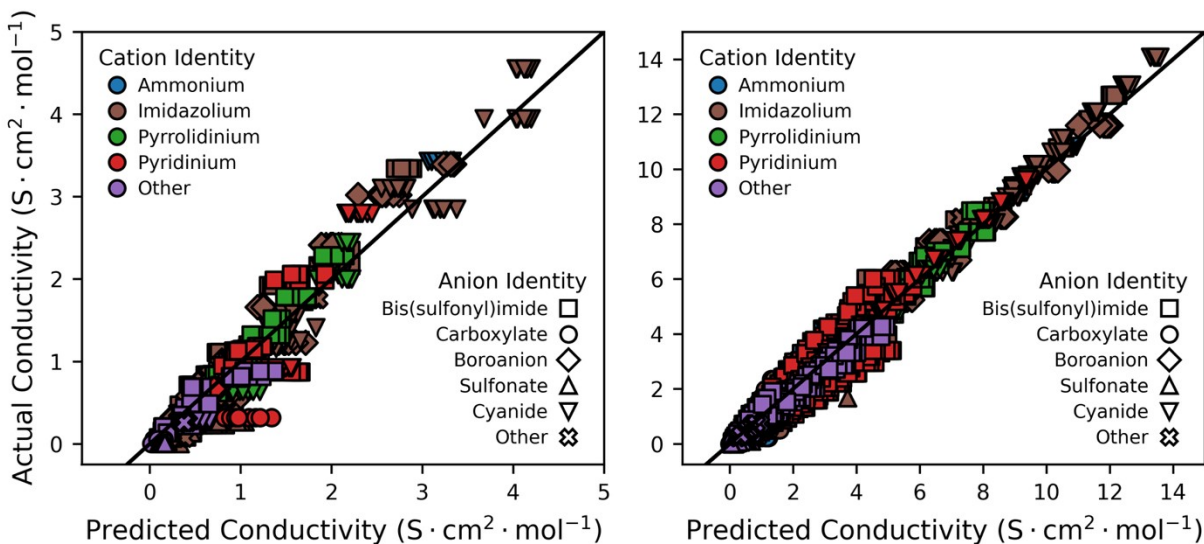

**Figure S10.** Random forest regression train set parity plot using our custom SMARTS representation inputs colored by cations and shaped by anions for 298 K (left) and at all temperatures (right).

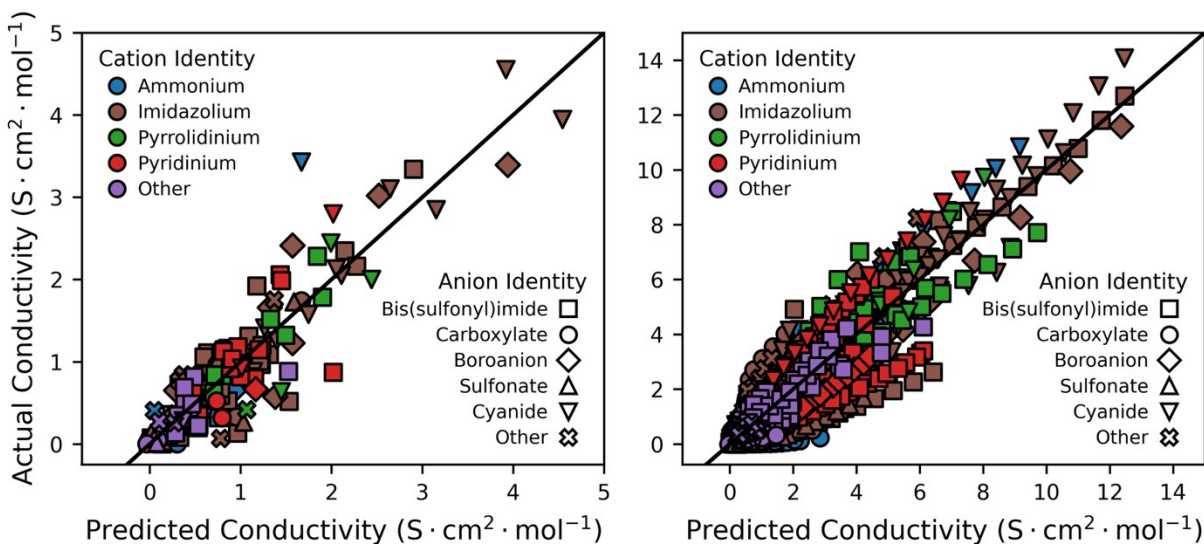

**Figure S11.** Neural network regression test set parity plot using our custom SMARTS representation inputs colored by cations and shaped by anions for 298 K (left) and at all temperatures (right).

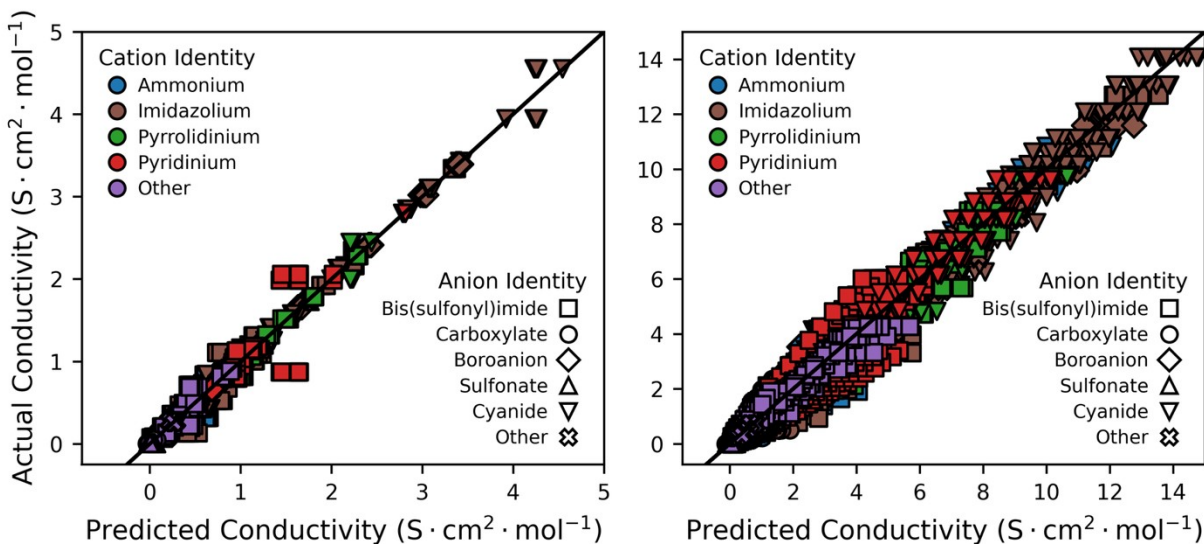

**Figure S12.** Neural network regression train set parity plot using our custom SMARTS representation inputs colored by cations and shaped by anions for 298 K (left) and at all temperatures (right).

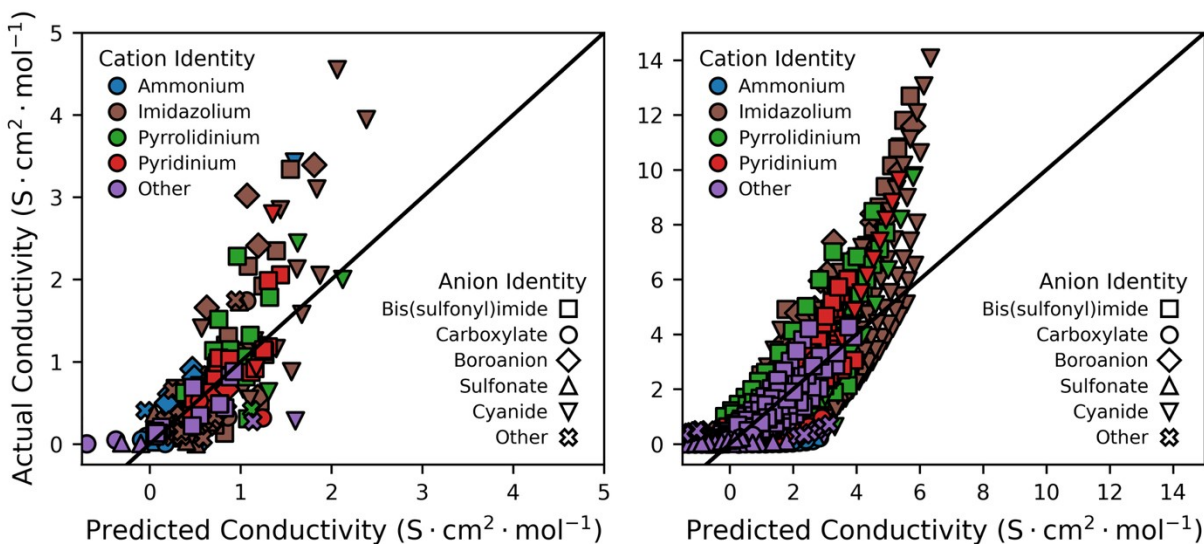

**Figure S13.** Linear ridge regression test set parity plot using MACCS Keys representation inputs colored by cations and shaped by anions for 298 K (left) and at all temperatures (right)

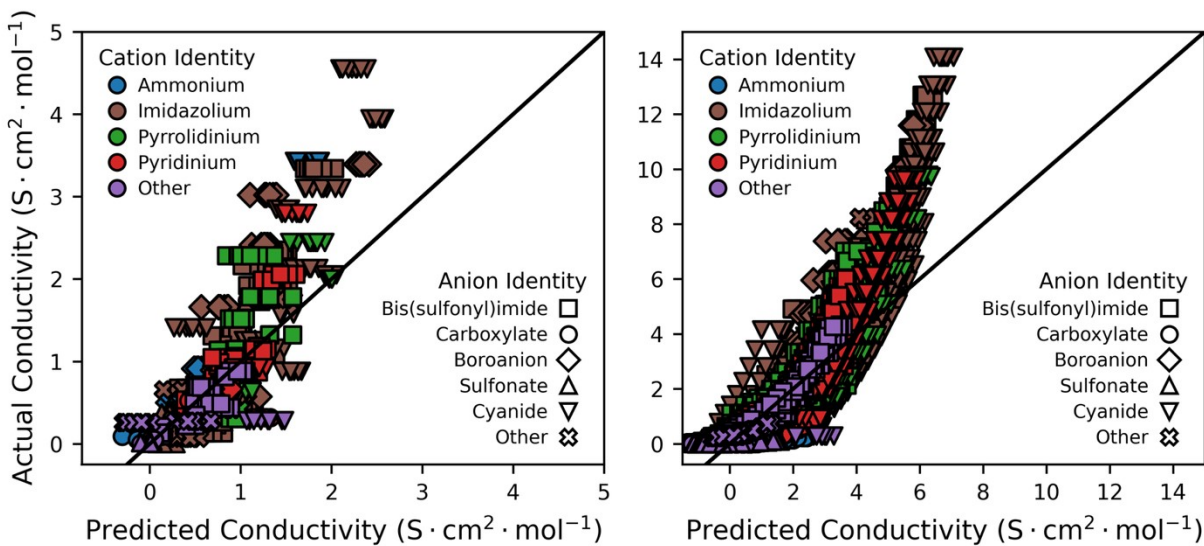

**Figure S14.** Linear ridge regression train set parity plot using MACCS Keys representation inputs colored by cations and shaped by anions for 298 K (left) and at all temperatures (right).

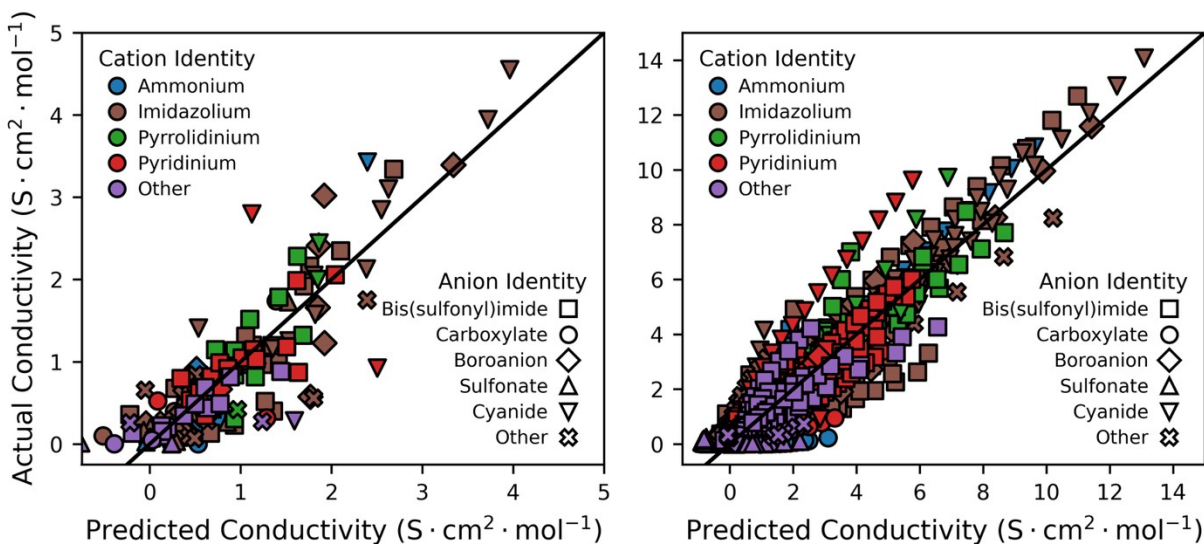

**Figure S15.** RBF kernel ridge regression test set parity plot using MACCS Keys representation inputs colored by cations and shaped by anions for 298 K (left) and at all temperatures (right).

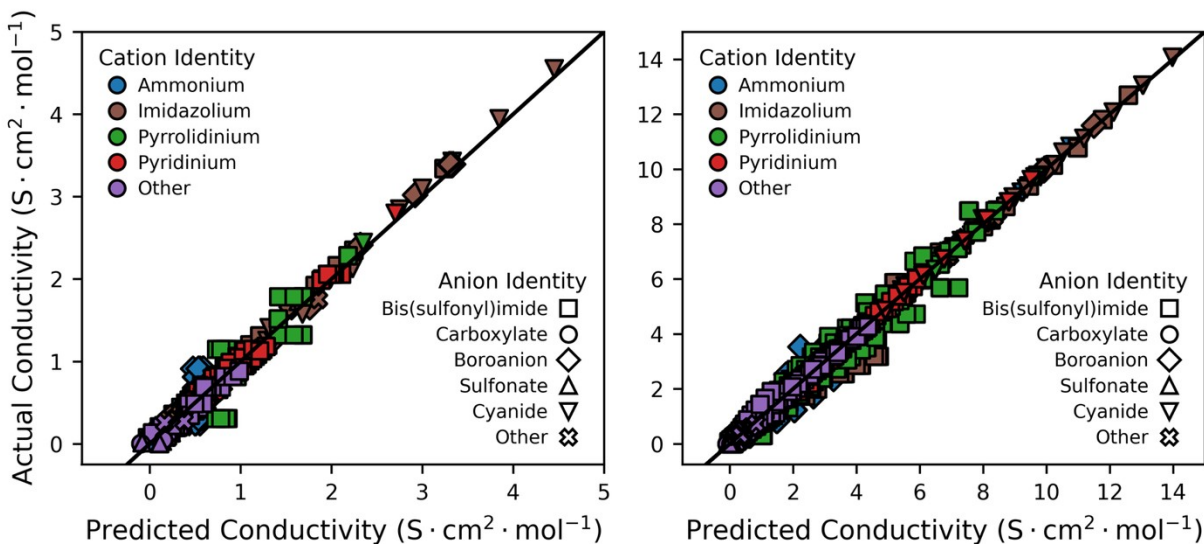

**Figure S16.** RBF kernel ridge regression train set parity plot using MACCS Keys representation inputs colored by cations and shaped by anions for 298 K (left) and at all temperatures (right).

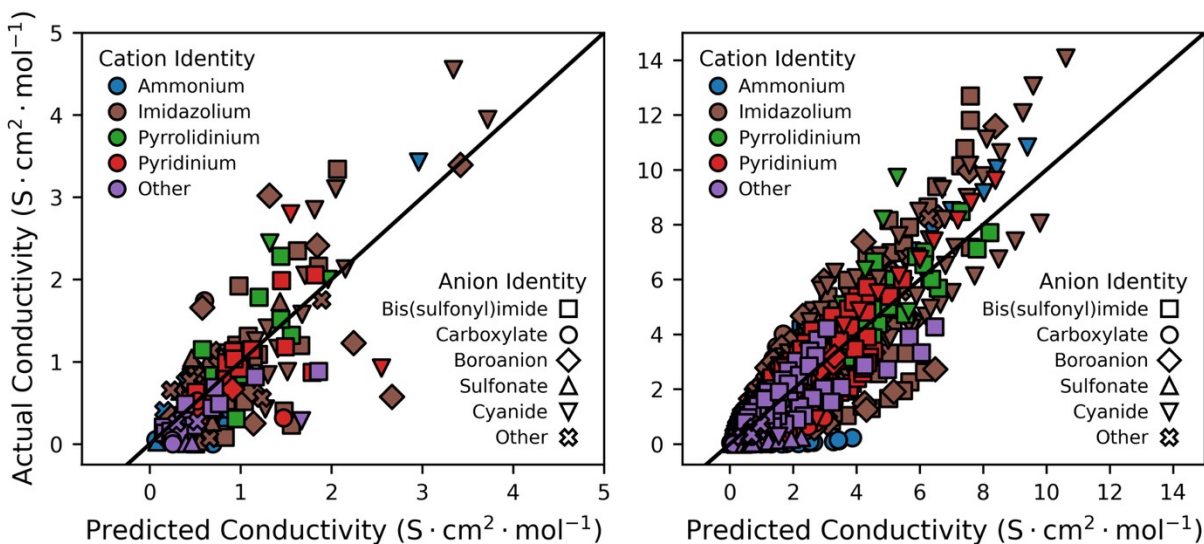

**Figure S17.** Random forest regression test set parity plot using MACCS Keys representation inputs colored by cations and shaped by anions for 298 K (left) and at all temperatures (right).

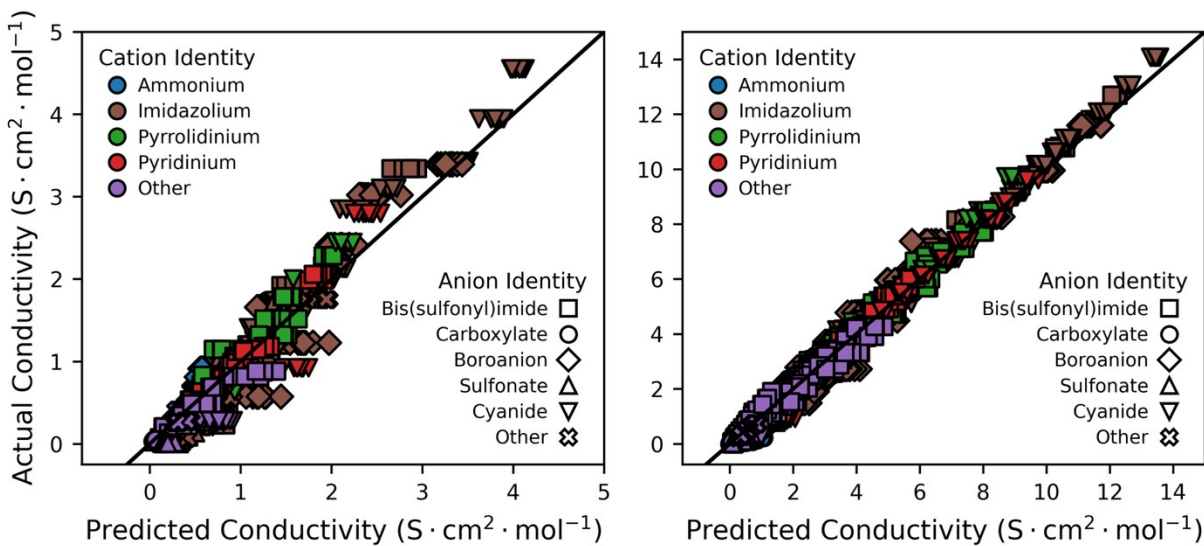

**Figure S18.** Random forest regression train set parity plot using MACCS Keys representation inputs colored by cations and shaped by anions for 298 K (left) and at all temperatures (right).

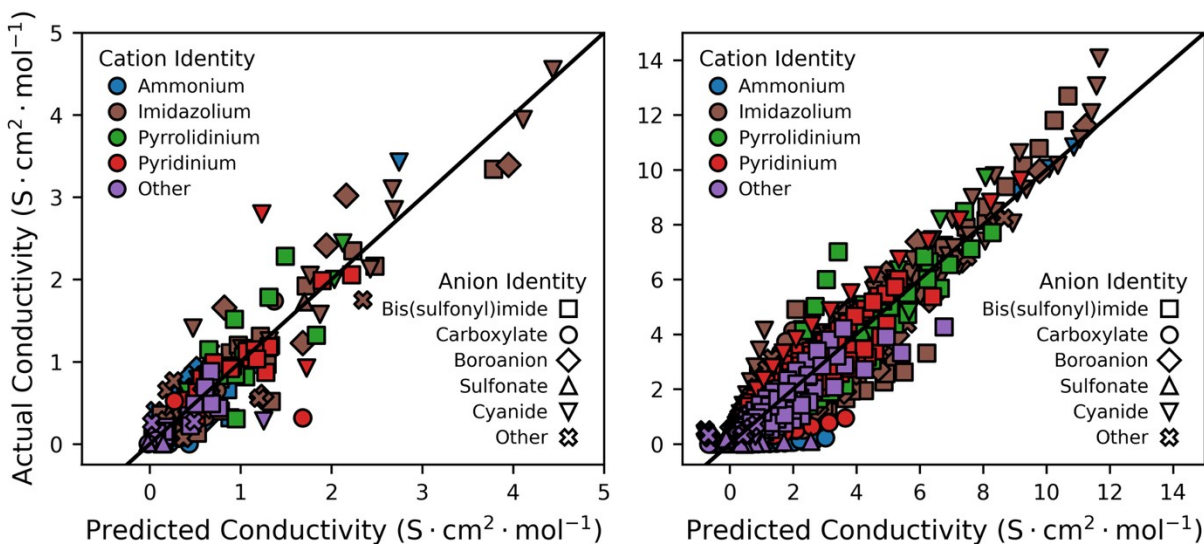

**Figure S19.** Neural network regression test set parity plot using MACCS Keys representation inputs colored by cations and shaped by anions for 298 K (left) and at all temperatures (right).

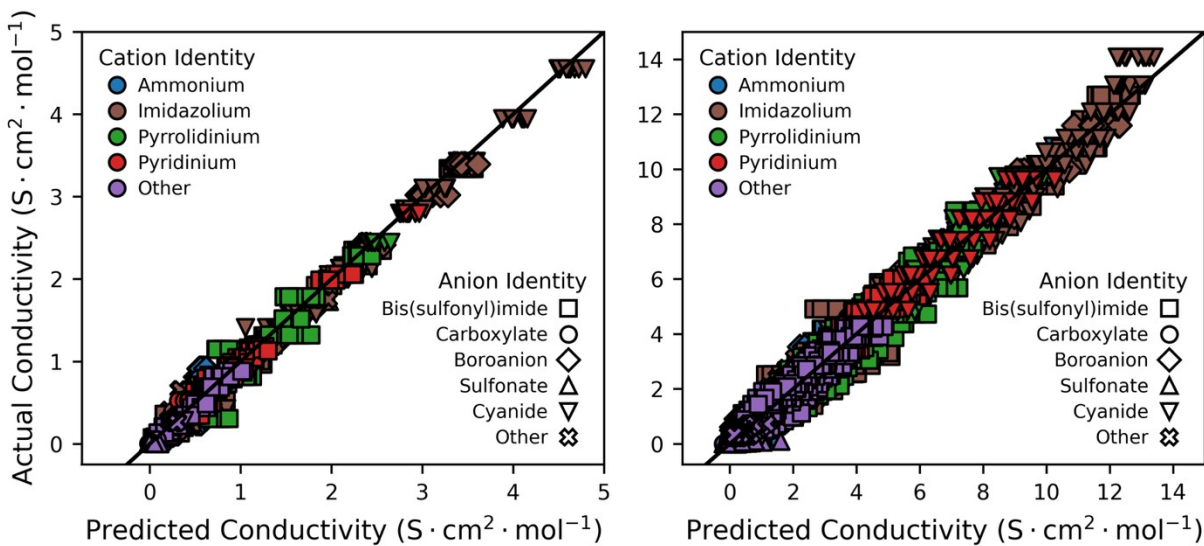

**Figure S20.** Neural network regression train set parity plot using MACCS Keys representation inputs colored by cations and shaped by anions for 298 K (left) and at all temperatures (right).

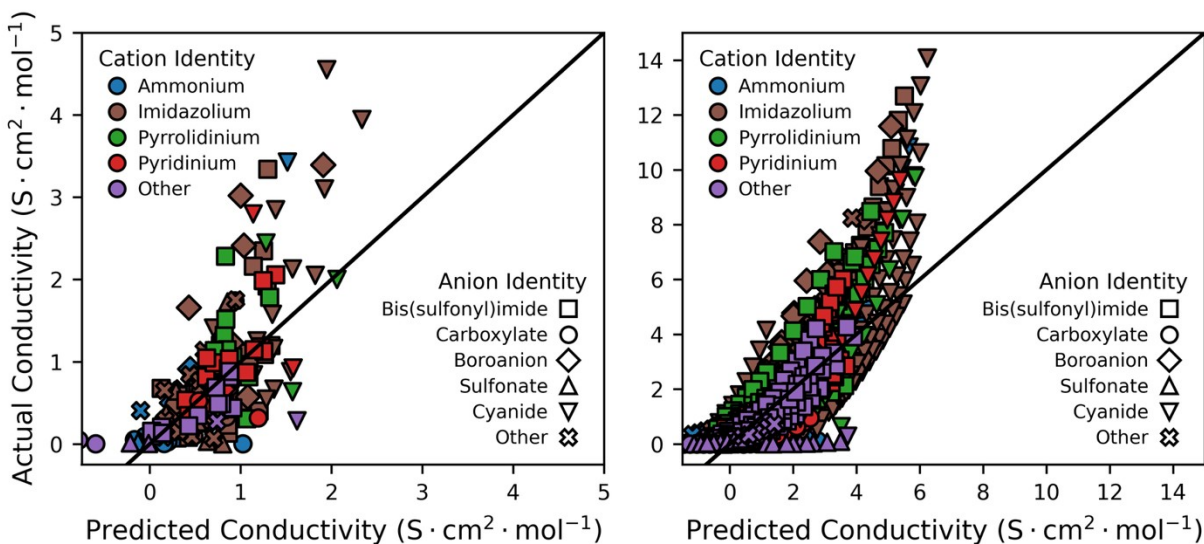

**Figure S21.** Linear ridge regression test set parity plot using 36-dimension PCA MACCS Keys representation inputs colored by cations and shaped by anions for 298 K (left) and at all temperatures (right).

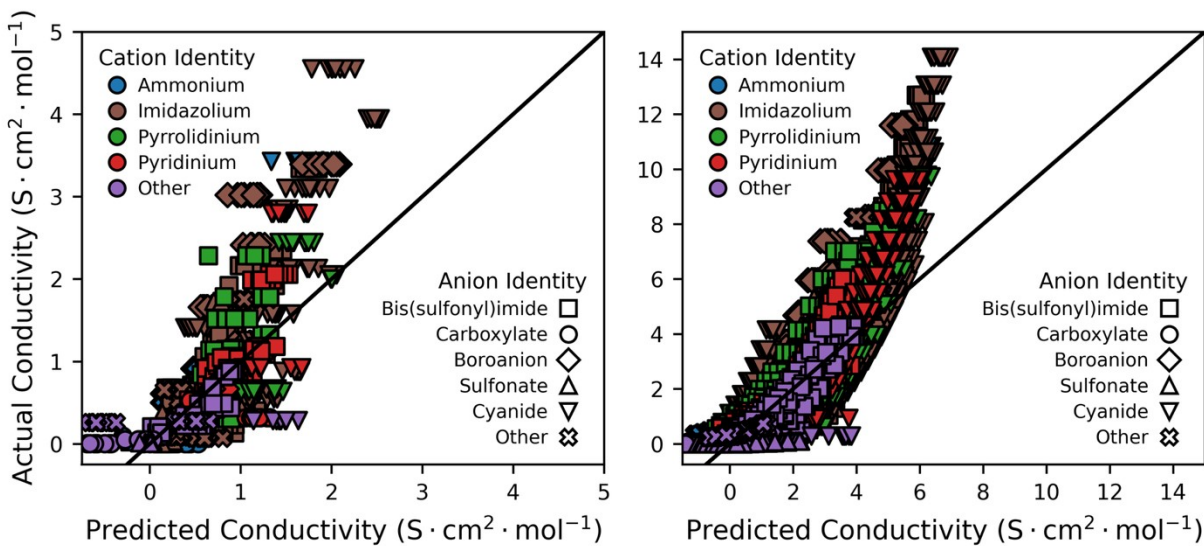

**Figure S22.** Linear ridge regression train set parity plot using 36-dimension PCA MACCS Keys representation inputs colored by cations and shaped by anions for 298 K (left) and at all temperatures (right).

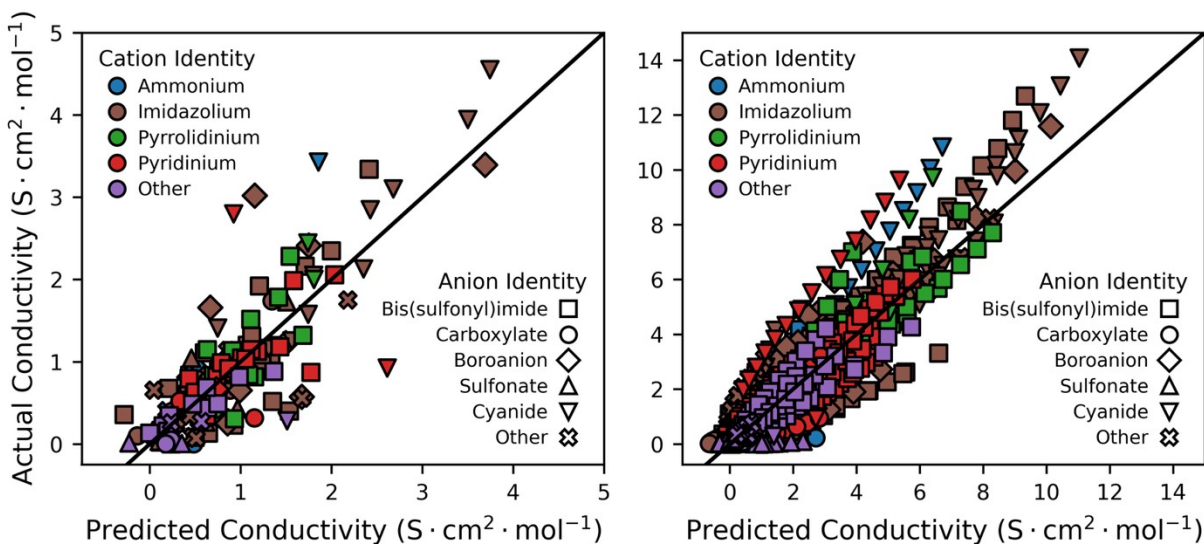

**Figure S23.** RBF kernel ridge regression test set parity plot using 36-dimension PCA MACCS Keys representation inputs colored by cations and shaped by anions for 298 K (left) and at all temperatures (right).

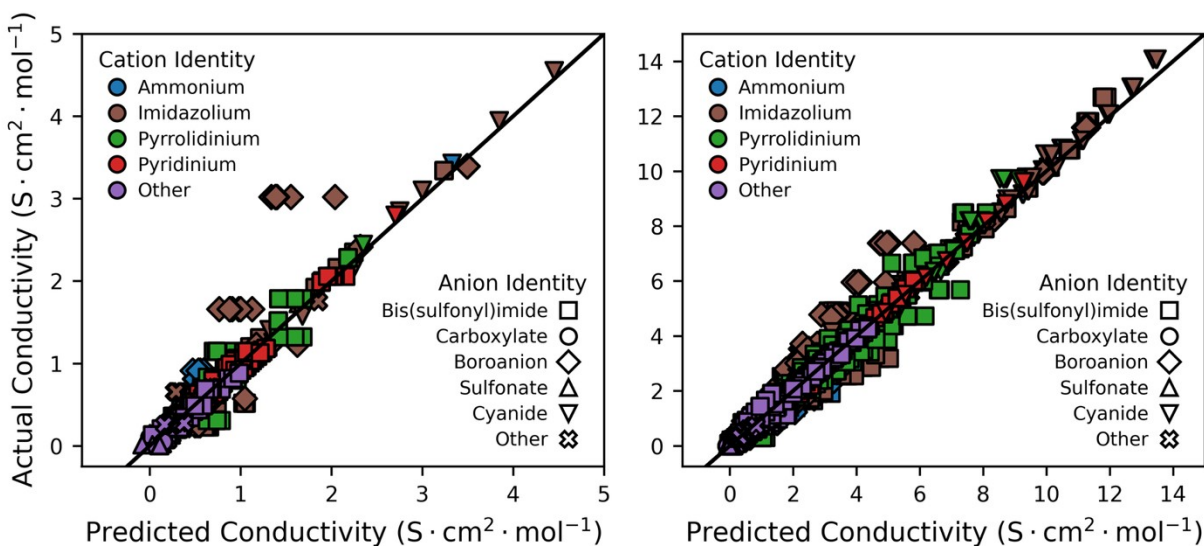

**Figure S24.** RBF kernel ridge regression train set parity plot using 36-dimension PCA MACCS Keys representation inputs colored by cations and shaped by anions for 298 K (left) and at all temperatures (right).

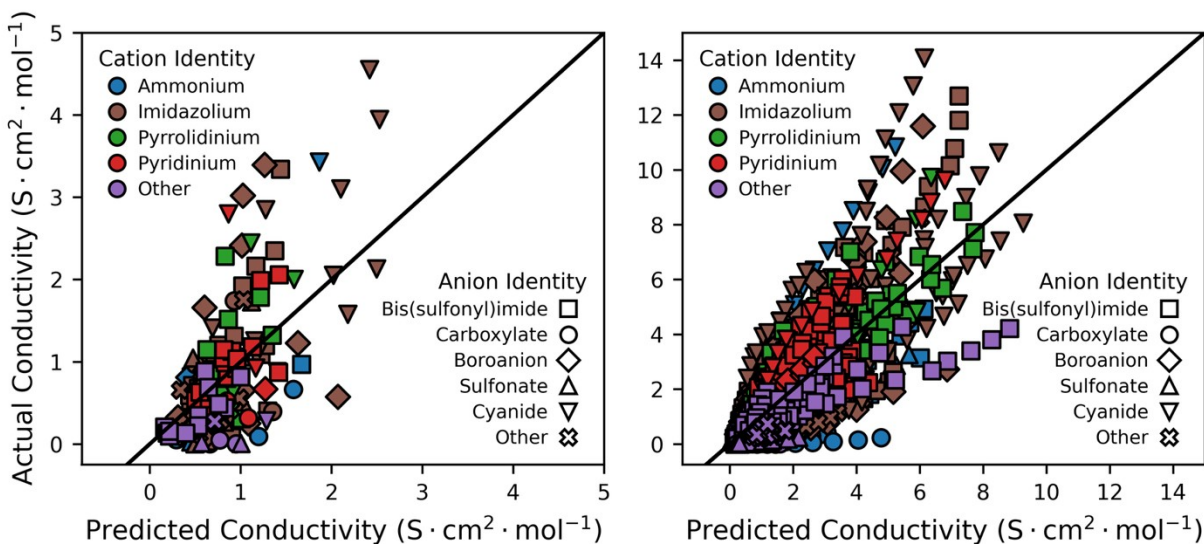

**Figure S25.** Random forest regression test set parity plot using 36-dimension PCA MACCS Keys representation inputs colored by cations and shaped by anions for 298 K (left) and at all temperatures (right).

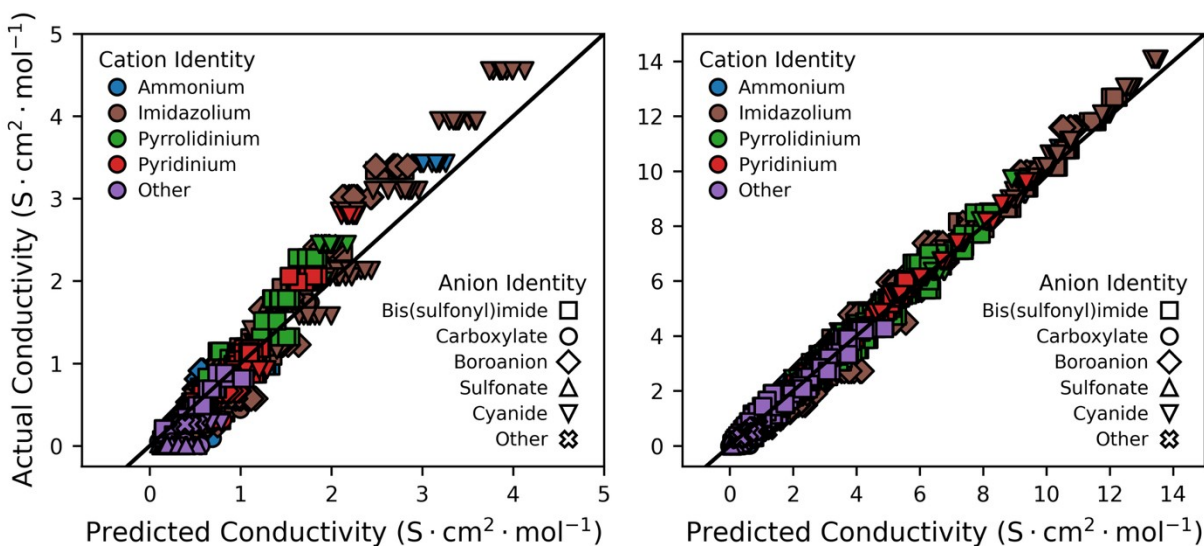

**Figure S26.** RBF kernel ridge regression train set parity plot using 36-dimension PCA MACCS Keys representation inputs colored by cations and shaped by anions for 298 K (left) and at all temperatures (right).

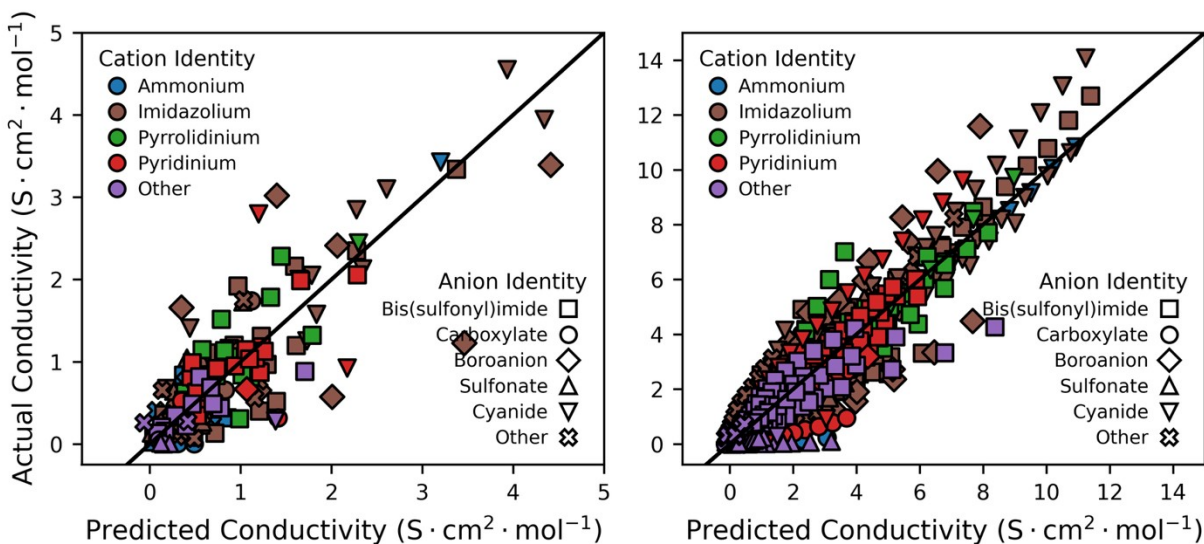

**Figure S27.** Neural network regression test set parity plot using 36-dimension PCA MACCS Keys representation inputs colored by cations and shaped by anions for 298 K (left) and at all temperatures (right).

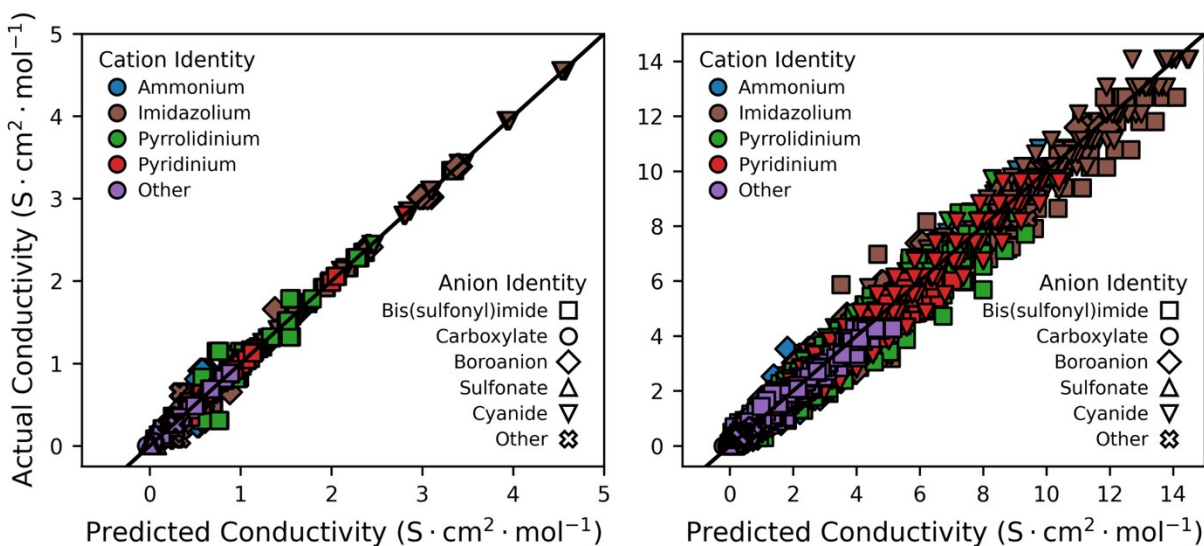

**Figure S28.** Neural network regression train set parity plot using 36-dimension PCA MACCS Keys representation inputs colored by cations and shaped by anions for 298 K (left) and at all temperatures (right).

## Bibliography

1. SMARTS: A Language for Describing Molecular Patterns, <http://www.daylight.com/dayhtml/doc/theory/theory.smarts.html>).
2. A. Goscinski, V. Principe, G. Fraux, S. Kliavinek, B. Helfrecht, P. Loche, M. Ceriotti and R. Cersonsky, *Open Research Europe*, 2023, **3**.
3. RDKit: Open-Source Cheminformatics Software, <https://www.rdkit.org/>, (accessed 8/8/2022, 2022).
4. B. A. Helfrecht, R. K. Cersonsky, G. Fraux and M. Ceriotti, *Mach Learn-Sci Techn*, 2020, **1**.
